# Supplementary material
Source: ML conference proceedings conference paper supplement (https://aclanthology.org/2024.inlg-main.26)
Supplement: Supplementary_Attachment [file 2024.inlg-main.26.Supplementary_Attachment.pdf]

## A Appendix

### A.1 Data Set

(Xie et al., 2017) The CLOTH dataset, comprising English cloze tests with sentences, missing words, answers, and distractors, serves as the benchmarking dataset in this study. To enhance model training efficiency, we refined the dataset by removing extraneous spaces, special characters, double quotes, and numbers. These modifications reduce potential parsing errors and improve data quality, as detailed in Table 1. This cleaned dataset is used for both training and evaluating our language model.

| Dataset        | CLOTH  |        |        |        | CLOTH-F (Filtered) |       |        |        |
|----------------|--------|--------|--------|--------|--------------------|-------|--------|--------|
|                | Train  | Dev    | Test   | All    | Train              | Dev   | Test   | All    |
| # of Questions | 76,850 | 11,067 | 11,516 | 99,433 | 69,939             | 9,696 | 10,422 | 90,057 |

Table 1: CLOTH Dataset

### A.2 CEFR Table

Utilizing Cambridge English Language Assessment for Languages (CEFR), the proficiency level of these words is assessed. The modal level of these words is computed to determine the learners language proficiency, which is then translated into numerical values as detailed in Table 2. This process allows for a quantification of the learner’s proficiency.

### A.3 DG Evaluation by GPT-4

We conducted a study to assess GPT-4’s ability to evaluate distractor quality using 105 English cloze questions from Taiwan’s General Scholastic Ability Test (GSAT), employed for university admissions. Using the CDGP system, distractors were generated for these questions. Subsequently, GPT-4 evaluated both the original and CDGP-generated distractors. The results, depicted in Figure 3, show GPT-4 favored GSAT distractors 92.4% of the time, demonstrating its effectiveness in quality assessment of multiple-choice questions and confirming its potential as a reliable tool for automated question assessment.

### A.4 Implementation Details

We employed the 7B version of the LLaMA2 model, optimized through the LoRA method for efficient usage under constrained computational resources. The model was fine-tuned using two

| Level | A1 | A2 | B1 | B2 | C1 | C2 |
|-------|----|----|----|----|----|----|
| Value | 1  | 2  | 3  | 4  | 5  | 6  |

Table 2: CEFR Level and Value Conversion

| Method                 | Percentage |
|------------------------|------------|
| Ground truth           | 92.4%      |
| CDGP Generated Results | 7.6%       |

Table 3: Comparison of Ground Truth vs CDGP’s Generated Results

NVIDIA GeForce RTX 3090 Ti GPUs. The initial QSG model training process involved training on 20,000 entries from the CLOTH dataset with the following parameters: a train batch size of 4 per device, gradient accumulation steps of 32, 3 training epochs, and an initial learning rate of 1e-4. The initial DG model training process involved training on 10,000 entries from the CLOTH dataset with the same parameters, except for an initial learning rate of 3e-4.

The personalized QSG model training process involved training on 4,000 entries from the CLOTH dataset, which included 2,000 entries of personalized level training data and 2,000 entries from the training data used for the initial QSG model. The personalized DG model training process involved training on 3,000 entries from the CLOTH dataset, which included 2,000 entries of personalized level training data and 1,000 entries from the training data used for the initial DG model. Both personalized models used the same parameter set: a train batch size of 4 per device, gradient accumulation steps of 32, 3 training epochs, and an initial learning rate of 3e-4.

| Experiment               | Model Configuration                                          | Mean | Median | STD   |
|--------------------------|--------------------------------------------------------------|------|--------|-------|
| A1 Sentence Difficulty   | <b>Baseline Model:</b> 20000 training entries                | 1.88 | 1.67   | 0.886 |
|                          | <b>Enhanced A1 Model:</b> 2000 new entries + 10% old entries | 2.19 | 2.0    | 0.997 |
| A2 Sentence Difficulty   | <b>Baseline Model:</b> 20000 training entries                | 2.42 | 2.0    | 0.80  |
|                          | <b>Enhanced B2 Model:</b> 2000 new entries + 10% old entries | 3.0  | 3.0    | 0.893 |
| B1 Sentence Difficulty   | <b>Baseline Model:</b> 20000 training entries                | 2.82 | 2.50   | 0.770 |
|                          | <b>Enhanced B2 Model:</b> 2000 new entries + 10% old entries | 3.11 | 3.50   | 0.654 |
| B2 Sentence Difficulty   | <b>Baseline Model:</b> 20000 training entries                | 3.05 | 3.0    | 0.714 |
|                          | <b>Enhanced B2 Model:</b> 2000 new entries + 10% old entries | 3.71 | 4.0    | 0.593 |
| A1 Sentence Difficulty   | <b>Baseline Model:</b> 10000 training entries                | 2.10 | 2.0    | 0.933 |
|                          | <b>Enhanced A1 Model:</b> 2000 new entries + 10% old entries | 1.70 | 1.50   | 0.869 |
| A2 Sentence Difficulty   | <b>Baseline Model:</b> 10000 training entries                | 2.48 | 2.50   | 0.808 |
|                          | <b>Enhanced B2 Model:</b> 2000 new entries + 10% old entries | 2.54 | 2.5    | 0.852 |
| B1 Sentence Difficulty   | <b>Baseline Model:</b> 10000 training entries                | 2.9  | 3      | 0.667 |
|                          | <b>Enhanced B2 Model:</b> 2000 new entries + 10% old entries | 2.79 | 2.75   | 0.679 |
| B2 Sentence Difficulty   | <b>Baseline Model:</b> 10000 training entries                | 3.29 | 3.5    | 0.759 |
|                          | <b>Enhanced B2 Model:</b> 2000 new entries + 10% old entries | 3.67 | 4.0    | 0.505 |
| A1 Distractor Difficulty | <b>Baseline Model:</b> 20000 training entries                | 1.56 | 1.50   | 0.775 |
|                          | <b>Enhanced A1 Model:</b> 2000 new entries + 10% old entries | 1.52 | 1.0    | 0.776 |
| A2 Distractor Difficulty | <b>Baseline Model:</b> 20000 training entries                | 1.84 | 2.0    | 0.830 |
|                          | <b>Enhanced A1 Model:</b> 2000 new entries + 10% old entries | 1.85 | 2.0    | 0.730 |
| B1 Distractor Difficulty | <b>Baseline Model:</b> 20000 training entries                | 2.02 | 2.0    | 0.807 |
|                          | <b>Enhanced A1 Model:</b> 2000 new entries + 10% old entries | 1.92 | 2.0    | 0.828 |
| B2 Distractor Difficulty | <b>Baseline Model:</b> 20000 training entries                | 2.10 | 2.0    | 0.985 |
|                          | <b>Enhanced B2 Model:</b> 2000 new entries + 10% old entries | 2.15 | 2.0    | 1.130 |
| A1 Distractor Difficulty | <b>Baseline Model:</b> 10000 training entries                | 1.70 | 1.67   | 0.848 |
|                          | <b>Enhanced A1 Model:</b> 2000 new entries + 10% old entries | 1.52 | 1.17   | 0.818 |
| A2 Distractor Difficulty | <b>Baseline Model:</b> 10000 training entries                | 2.03 | 2.0    | 0.868 |
|                          | <b>Enhanced A1 Model:</b> 2000 new entries + 10% old entries | 1.86 | 2.0    | 0.790 |
| B1 Distractor Difficulty | <b>Baseline Model:</b> 10000 training entries                | 2.17 | 2.0    | 0.881 |
|                          | <b>Enhanced A1 Model:</b> 2000 new entries + 10% old entries | 1.91 | 2.0    | 0.898 |
| B2 Distractor Difficulty | <b>Baseline Model:</b> 10000 training entries                | 2.08 | 2.17   | 1.026 |
|                          | <b>Enhanced B2 Model:</b> 2000 new entries + 10% old entries | 2.40 | 2.5    | 1.189 |

Table 4: Experiment results comparing different training entries tuning for A1 and B2 difficulty levels across various experiments.

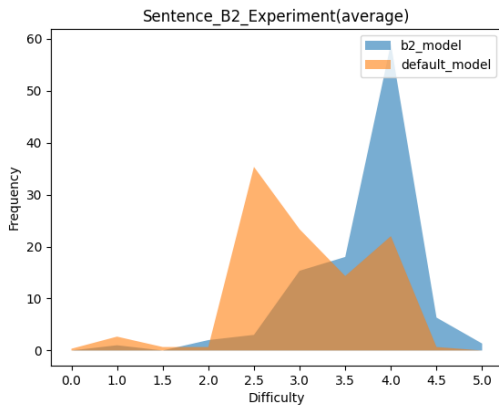

Figure 3: Distribution of Difficulty of Generated Questions

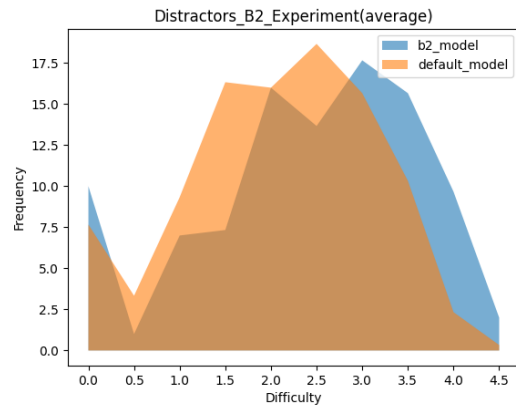

Figure 4: Distribution of Difficulty of Generated Distractors

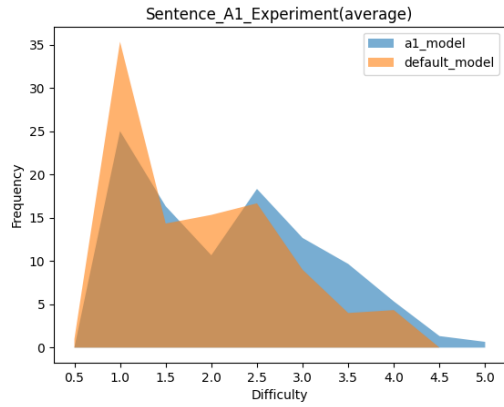

Figure 1: Distribution of Difficulty of Generated Question Stems

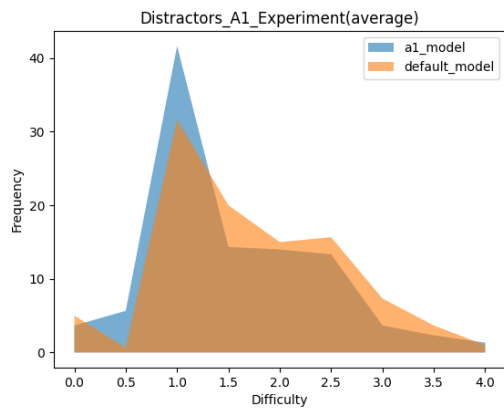

Figure 2: Distribution of Difficulty of Generated Distractors

## References

Qizhe Xie, Guokun Lai, Zihang Dai, and Eduard Hovy. 2017. Large-scale cloze test dataset created by teachers. *arXiv preprint arXiv:1711.03225*.
